# Supplementary material
Source: publisher figshare collection journal article supplement (https://acs.figshare.com/ndownloader/files/3812710)
Supplement: Supplementary file 1 [file 3812710]

## SUPPORTING INFORMATION AVAILABLE

Table S1 DPPH $\cdot$  scavenging activity of fractions obtained by gel filtration chromatography

| Fractions | DPPH $\cdot$ scavenging activity (%) |
|-----------|--------------------------------------|
| A         | 40.86 $\pm$ 1.10 <sup>b</sup>        |
| B         | 88.64 $\pm$ 1.98 <sup>a</sup>        |
| C         | 33.47 $\pm$ 1.18 <sup>c</sup>        |

Different letters (a, b, c) in the same column indicate significant differences (P < 0.05).

Table S2 DPPH $\cdot$  scavenging activity of fractions obtained by Ion exchange chromatography

| Fractions | DPPH $\cdot$ scavenging activity (%) |
|-----------|--------------------------------------|
| B1        | 48.31 $\pm$ 2.38 <sup>c</sup>        |
| B2        | 75.36 $\pm$ 1.70 <sup>b</sup>        |
| B3        | 43.73 $\pm$ 2.77 <sup>d</sup>        |
| B4        | 50.05 $\pm$ 1.05 <sup>c</sup>        |
| B5        | 93.63 $\pm$ 0.13 <sup>a</sup>        |
| B6        | 39.69 $\pm$ 1.48 <sup>d</sup>        |

Different letters (a, b, c) in the same column indicate significant differences (P < 0.05).
